# Supplementary material
Source: PubMed Central journal article supplement (PMC2635821)
Supplement: 0808584106_0808584106SI.pdf [file 0808584106_0808584106SI.pdf]

# Supporting Information

Berndt *et al.* 10.1073/pnas.0808584106

1. Roberts CJ, Pohlig G, Rothman JH, Stevens TH (1989) Structure, biosynthesis, and localization of dipeptidyl aminopeptidase B, an integral membrane glycoprotein of the yeast vacuole. *J Cell Biol* 108:1363–1373.
2. Fünfschilling U, Rospert S (1999) Nascent polypeptide-associated complex stimulates protein import into yeast mitochondria. *Mol Biol Cell* 10:3289–3299.
3. Raue U, Oellerer S, Rospert S (2007) Association of protein biogenesis factors at the yeast ribosomal tunnel exit is affected by the translational status and nascent polypeptide sequence. *J Biol Chem* 282:7809–7816.
4. Plath K, Rapoport TA (2000) Spontaneous release of cytosolic proteins from posttranslational substrates before their transport into the endoplasmic reticulum. *J Cell Biol* 151:167–178.
5. Krieg UC, Walter P, Johnson AE (1986) Photocrosslinking of the signal sequence of nascent preprolactin to the 54-kilodalton polypeptide of the signal recognition particle. *Proc Natl Acad Sci USA* 83:8604–8608.
6. McCormick PJ, Miao Y, Shao Y, Lin J, Johnson AE (2003) Cotranslational protein integration into the ER membrane is mediated by the binding of nascent chains to translocon proteins. *Mol Cell* 12:329–341.
7. Plath K, Mothes W, Wilkinson BM, Stirling CJ, Rapoport TA (1998) Signal sequence recognition in posttranslational protein transport across the yeast ER membrane. *Cell* 94:795–807.
8. Johnson AE, Woodward WR, Herbert E, Menninger JR (1976) N-epsilon-acetyllysine transfer ribonucleic acid: A biologically active analogue of aminoacyl transfer ribonucleic acids. *Biochemistry* 15:569–575.
9. Flanagan JJ, *et al.* (2003) Signal recognition particle binds to ribosome-bound signal sequences with fluorescence-detected subnanomolar affinity that does not diminish as the nascent chain lengthens. *J Biol Chem* 278:18628–18637.

**FLAG-Dap2** MDY**KDDDDK**EGGEEEVERIPDELFD**TKKK**HLLD**KL**IR**VGIILVLLI**WG**TVLLL****K**SIPHHSNTPDYQEP\*

**FLAG-Dap2TM** MDY**KDDDDK**EGGEEEVERIPDELFD**TKKK**HLLD**KL**IR**VGIILEHP****KSGTDS**SL**K**SIPHHSNTPDYQEP

**FLAG-Dap2 $\alpha$**  MDY**KDDDDK**EGGEEEVERIPDELFD**TKKK**HLLD**KL**IR**FLLEKEL****KYFGKALE**N**K**SIPHHSNTPDYQEP\*

Fig. S1. N-terminal 60 aa of Dap2, Dap2TM, and Dap2 $\alpha$ . The FLAG tag (blue) that was inserted between the Met (1) and Glu (2) of Dap2, Dap2TM, and Dap2 $\alpha$ . The transmembrane signal anchor sequence localized between amino acids 30 and 45 (1) is shown in red. Lysines which are amenable for chemical crosslinking are bold, and the positions at that the amber codon was introduced for photocross-linking are marked by an asterisk.



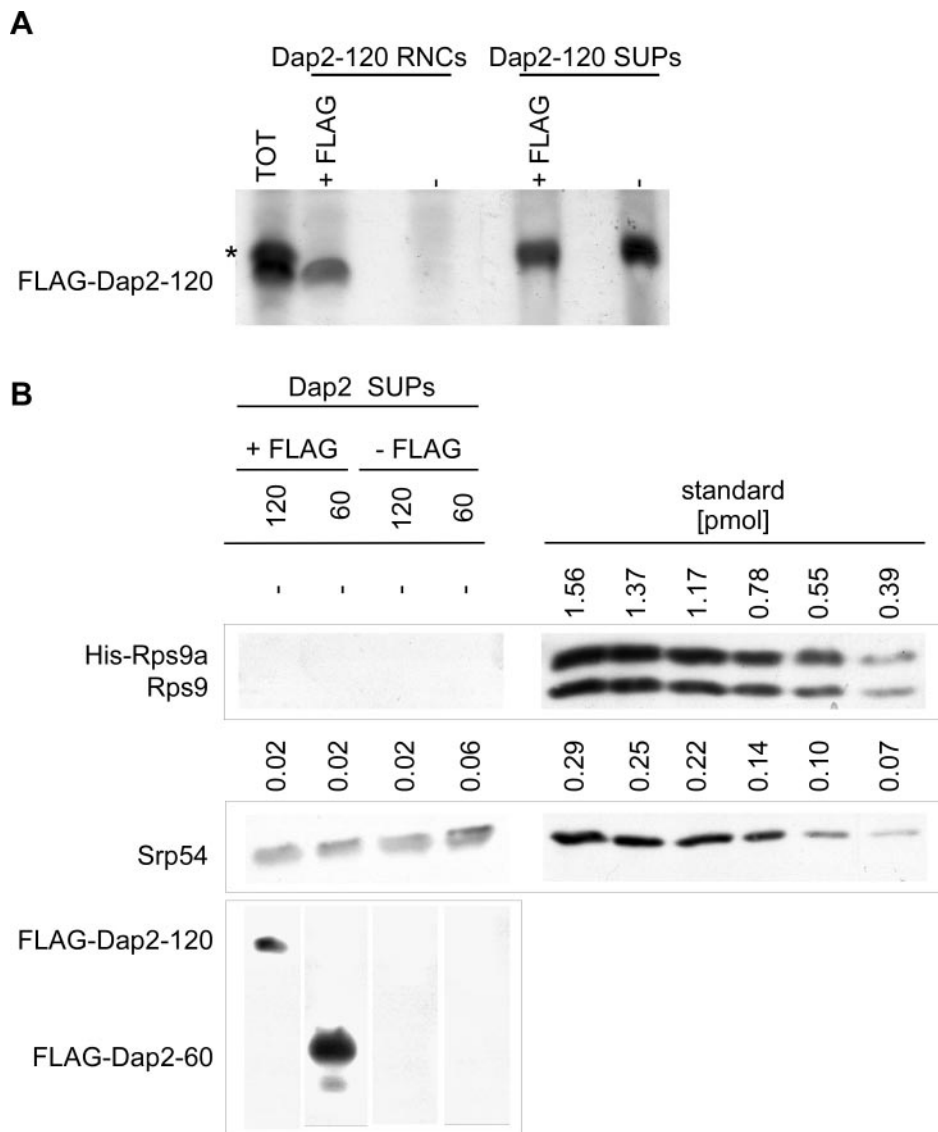

**Fig. S3.** SRP binds to FLAG-tagged chains only when they are attached to ribosomes as nascent chains. To test whether FLAG-tagged chains containing a SA were able by themselves to interact with SRP in our experimental set up we examined nascent chains after their release from ribosomes. SRP was coisolated together with neither FLAG-Dap2-120 nor FLAG-Dap2-60. This observation is in agreement with earlier data indicating that an SRP interacts with a signal sequence only in the context of the ribosome (4). (A) FLAG-tagged nascent polypeptides are quantitatively bound to ribosomes. After a translation reaction primed with FLAG-tagged Dap2-120 (+ FLAG) or without the addition of mRNA (-) ribosomes and RNCs were isolated via a low-salt sucrose cushion as described (3). Half of the total reaction (TOT), the supernatant after centrifugation (SUPs), and the ribosomal pellet (RNCs) was analyzed by immunostaining with  $\alpha$ FLAG antibody. The asterisk marks an  $\alpha$ FLAG cross-reactive yeast protein that runs just above FLAG-Dap2-120 and remains in the supernatant after affinity purification on  $\alpha$ FLAG-beads. (B) SRP does not bind to FLAG-tagged Dap2 released from ribosomes. FLAG-Dap2-120 or FLAG-Dap2-60 (+ FLAG) released from ribosomes after *in vitro* translation were separated from RNCs and ribosomes by centrifugation through a low-salt sucrose cushion. Supernatants (Dap2 SUPs) were applied to native immunoprecipitation using  $\alpha$ FLAG beads. The material recovered on  $\alpha$ FLAG beads and purified standard proteins were analyzed by immunoblotting using  $\alpha$ Rps9,  $\alpha$ Srp54, and  $\alpha$ FLAG antibodies. Signals obtained from the same exposure of a single gel are boxed. In case of the standard, numbers above the lanes give the amount of the respective purified protein loaded to the gel in pmol. The background derived from an identically treated sample containing untagged Dap2-120 and Dap2-60 (- FLAG) was subtracted. FLAG-Dap2-120 and FLAG-Dap2-60 (+ FLAG) isolated under these conditions were free of ribosomes or SRP.

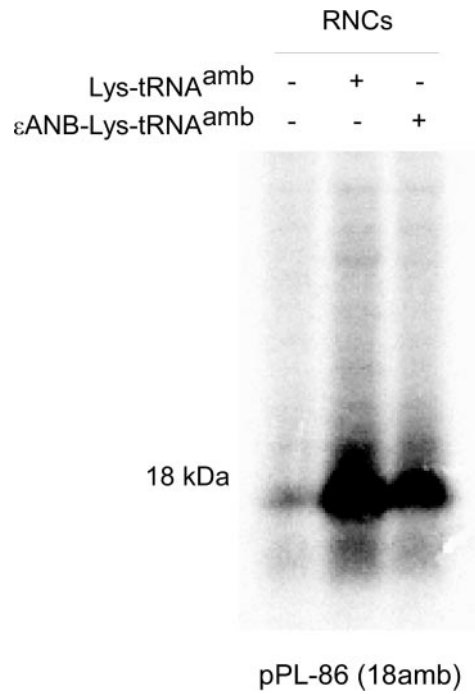

**Fig. S4.** Site-specific cross-linking in a homologous yeast translation system. Previous studies employing eukaryotic RNCs for site-specific cross-linking were based on either wheat germ translation (e.g., refs. 5 and 6) or reticulocyte lysate translation (e.g., ref. 7). Here, we have used a yeast translation system for the incorporation of a photo probe into a nascent chain.  $\epsilon$ ANB-Lys-tRNA<sup>amb</sup> was prepared as described (5, 6, 8, 9). We initially tested the incorporation of Lys-tRNA<sup>amb</sup> and the  $\epsilon$ ANB-Lys-tRNA<sup>amb</sup> in pPL-86 (18 amb) lacking a stop codon (9). Translation was performed as described in *Materials and Methods* without addition of a suppressor tRNA, in presence of Lys-tRNA<sup>amb</sup>, or in the presence of  $\epsilon$ ANB-Lys-tRNA<sup>amb</sup>. Lysine and  $\epsilon$ ANB-lysine were effectively incorporated at the position of the amber codon and recovered in the ribosomal pellet after centrifugation through a sucrose cushion.

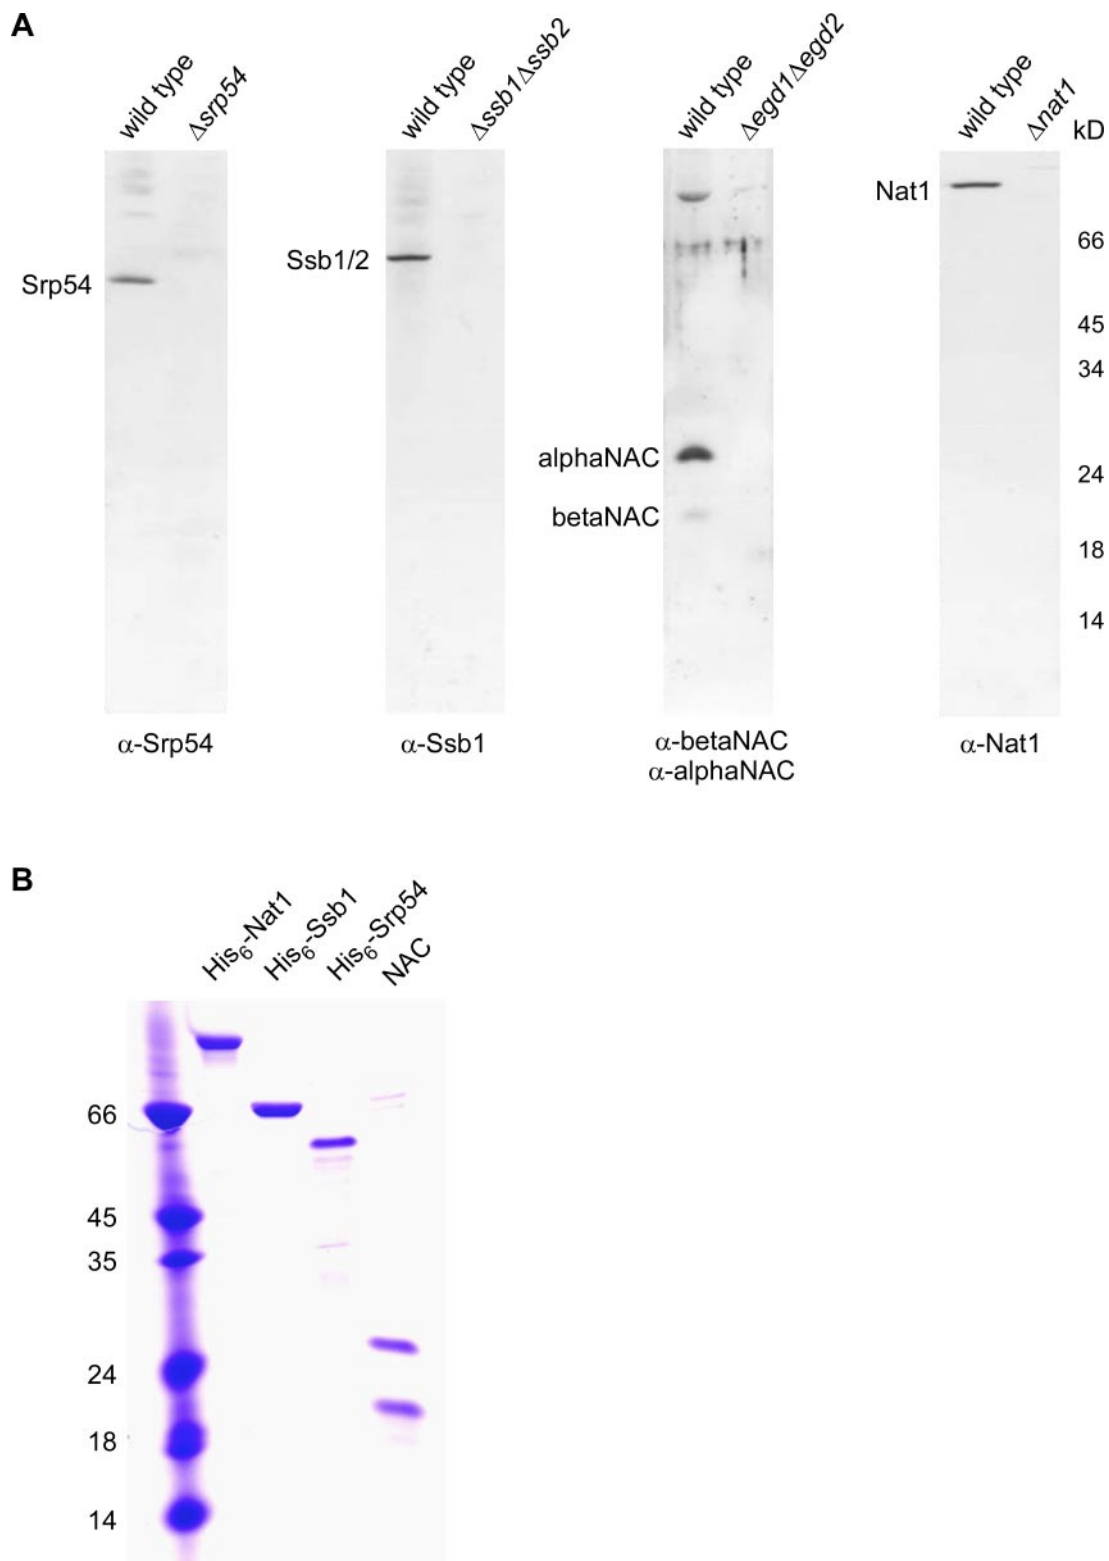

**Fig. S5.** Proteins and antibodies used for quantitative immunoblotting. (A) Polyclonal rabbit antibodies used in the pull-down experiments were tested for their specificity on total yeast extract derived either from wild-type or the respective deletion strains. Immunoblots were developed with ECL as described in *Materials and Methods*. (B) Purified proteins used for quantification of RPBs in the immunoblots. Shown is a Coomassie-stained gel with 2  $\mu$ g of each of the standard protein. Nat1, Ssb1, and Srp54 were expressed as N-terminally His-tagged versions in *Escherichia coli* (3). NAC was purified from yeast (2).
